# Supplementary material for: Fluoroquinolone use and risk of aortic aneurysm and dissection: nationwide cohort study
Source: PubMed Central journal article supplement — BMJ. 2018 Mar 8;360:k678. doi: 10.1136/bmj.k678 (PMC5842359; doi:10.1136/bmj.k678), 2018-03-08
Supplement: pasb040029.ww.pdf [file pasb040029.ww.pdf]

# Web appendix: Supplementary material

## Fluoroquinolone use and risk of aortic aneurysm and dissection: nationwide cohort study

Björn Pasternak, MD, PhD; Malin Inghammar, MD, PhD; Henrik Svanström, PhD

### Table of contents

|        |                                                                                                                                                                                                           |
|--------|-----------------------------------------------------------------------------------------------------------------------------------------------------------------------------------------------------------|
| Page 2 | <b>WebTable 1.</b> ICD-10 and ATC codes for exclusions                                                                                                                                                    |
| Page 3 | <b>WebTable 2.</b> Covariates included in propensity score with ICD-10 and ATC codes                                                                                                                      |
| Page 5 | <b>WebTable 3.</b> ICD-10 codes for primary outcome                                                                                                                                                       |
| Page 6 | <b>WebTable 4.</b> ICD-10 codes for outcome definition in sensitivity analyses                                                                                                                            |
| Page 7 | <b>WebTable 5.</b> Baseline characteristics before propensity score-matching                                                                                                                              |
| Page 9 | <b>WebTable 6.</b> Cases of aortic aneurysm or dissection occurring in 60-day risk period from start of treatment with oral fluoroquinolones, as compared with amoxicillin, according to type of aneurysm |

**WebTable 1.** ICD-10 and ATC codes for exclusions

| <b>Diagnosis</b>                                                           | <b>ICD-10 or ATC code</b>                                                                                    |
|----------------------------------------------------------------------------|--------------------------------------------------------------------------------------------------------------|
| Endstage illness (dementia, severe malnutrition, cachexia, coma, gangrene) | ICD-10: E105B, E115B, E40, E41, E42, E43, F00, F01, F02, F03, G30, I702A, R029, R402, R64, Z991<br>ATC: N06D |
| Drug/alcohol misuse                                                        | ICD-10: F10, F11, F12, F13, F14, F15, F16, F18, F19, R781, R782, R783, R784, R785, T40                       |

**WebTable 2.** Covariates included in propensity Score with ICD-10 and ATC codes

| <b>Covariate</b>                                          | <b>Code</b>                                                                                                                                                      |
|-----------------------------------------------------------|------------------------------------------------------------------------------------------------------------------------------------------------------------------|
| <b>Demographic characteristics<sup>a</sup></b>            |                                                                                                                                                                  |
| Sex                                                       |                                                                                                                                                                  |
| Age (continuous)                                          |                                                                                                                                                                  |
| Region of residence (6 categories)                        |                                                                                                                                                                  |
| <b>Medical history<sup>b</sup></b>                        |                                                                                                                                                                  |
|                                                           | <b>ICD-10 code</b>                                                                                                                                               |
| Acute coronary syndrome                                   | I200, I21-22                                                                                                                                                     |
| Other ischemic heart disease                              | I11 (not I110), I20 (not I200), I24, I25                                                                                                                         |
| Heart failure/cardiomyopathy                              | I110, I130, I132, I42, I43, I50, J81                                                                                                                             |
| Valve disorders                                           | I34-37                                                                                                                                                           |
| Cerebrovascular disease                                   | G45, G46, I60-69                                                                                                                                                 |
| Arterial disease                                          | I65, I70, I72-I77, K550, K551                                                                                                                                    |
| Arrhythmia                                                | I44-49                                                                                                                                                           |
| Cardiac surgery/invasive cardiac procedure in previous yr | procedure code F                                                                                                                                                 |
| Lung disease                                              | I27, J84, R092, E662, J40-47, J60-70, J92, J96, J982, J983; procedure code GGB                                                                                   |
| Cancer                                                    | C00-C43, C45-C97                                                                                                                                                 |
| Cancer in previous yr                                     | C00-C43, C45-C97                                                                                                                                                 |
| Liver disease                                             | B18, I850, I859, I982, K70-K77                                                                                                                                   |
| Renal disease                                             | I12, I13, N00-08, N17, N18, N19, N25, Z49                                                                                                                        |
| Rheumatic disease                                         | M05-09, M30-34, M351, M353, M45                                                                                                                                  |
| Psychiatric disorder                                      | F04-09, F20-99                                                                                                                                                   |
| <b>Prescription-drug use in previous yr<sup>c</sup></b>   |                                                                                                                                                                  |
|                                                           | <b>ATC code</b>                                                                                                                                                  |
| ACE-inhibitor or ARB                                      | C09A-D                                                                                                                                                           |
| Calcium channel blocker                                   | C08C, C08D                                                                                                                                                       |
| Loop diuretic                                             | C03C, C03EB                                                                                                                                                      |
| Other diuretic                                            | C03A, C03B, C03D, C03EA                                                                                                                                          |
| Beta-blocker                                              | C07                                                                                                                                                              |
| Digoxin                                                   | C01AA05                                                                                                                                                          |
| Nitrates                                                  | C01DA                                                                                                                                                            |
| Platelet inhibitor                                        | B01AC                                                                                                                                                            |
| Anticoagulant                                             | B01AA                                                                                                                                                            |
| Lipid lowering drug                                       | C10                                                                                                                                                              |
| Oral antidiabetic drug                                    | A10B                                                                                                                                                             |
| Insulin                                                   | A10A                                                                                                                                                             |
| Antidepressant                                            | N06A                                                                                                                                                             |
| Antipsychotic                                             | N05A                                                                                                                                                             |
| Anxiolytic, hypnotic or sedative                          | N05B, N05C                                                                                                                                                       |
| Beta-2 agonist inhalant                                   | R03AC                                                                                                                                                            |
| Anticholinergic inhalant                                  | R03BB                                                                                                                                                            |
| Glucocorticoid inhalant                                   | R03BA, R03AK                                                                                                                                                     |
| Oral glucocorticoid                                       | H02AB                                                                                                                                                            |
| NSAID                                                     | M01A                                                                                                                                                             |
| Opiate                                                    | N02A                                                                                                                                                             |
| Systemic hormone replacement therapy                      | G03CA03, G03CA04, G03CA53, G03CA57, G03FA01, G03FA11, G03FA12, G03FA15, G03FA17, G03FB01, G03FB05, G03FB06, G03FB09, G03FB11, G03HB01, G03XC01, G03DC05, G03CX01 |
| No. of drugs used (1-2, 3-5, 6-9, ≥10)                    |                                                                                                                                                                  |
| <b>Non-study antibiotic in previous 120 d<sup>c</sup></b> | J01 (not J01MA, not J01CA04)                                                                                                                                     |
| <b>Health care utilization<sup>b</sup></b>                |                                                                                                                                                                  |
| Hospitalization due to cardiovascular                     |                                                                                                                                                                  |

---

|                                                                    |
|--------------------------------------------------------------------|
| causes in previous yr                                              |
| Hospitalization due to non-cardiovascular causes in previous yr    |
| Outpatient contact due to cardiovascular causes in previous yr     |
| Outpatient contact due to non-cardiovascular causes in previous yr |
| Emergency department visit in previous 30 d                        |

---

<sup>a</sup>Data from Statistics Sweden (the national bureau of statistics)

<sup>b</sup>Data from National Patient Register

<sup>c</sup>Data from National Prescribed Drug Register

ACE angiotensin-converting enzyme; ARB angiotensin receptor blocker; NSAID nonsteroidal antiinflammatory drug; SD standard deviation

**WebTable 3.** ICD-10 codes for primary outcome

| <b>Primary outcome</b>              | <b>Data sources</b>                                   | <b>Outcome capture</b>                                                      | <b>ICD-10 code</b>                                                                                                                                                                                                                                                                                                                                                                                                                                                                        |
|-------------------------------------|-------------------------------------------------------|-----------------------------------------------------------------------------|-------------------------------------------------------------------------------------------------------------------------------------------------------------------------------------------------------------------------------------------------------------------------------------------------------------------------------------------------------------------------------------------------------------------------------------------------------------------------------------------|
| Aortic aneurysm or dissection (any) | National Patient Register and Cause of Death Register | Admission to hospital or emergency department, or underlying cause of death | I71.0-I71.9<br>Includes:<br>I71.0 Dissection of aorta<br>I71.1 Thoracic aortic aneurysm, ruptured<br>I71.2 Thoracic aortic aneurysm, without rupture<br>I71.3 Abdominal aortic aneurysm, ruptured<br>I71.4 Abdominal aortic aneurysm, without rupture<br>I71.5 Thoracoabdominal aortic aneurysm, ruptured<br>I71.6 Thoracoabdominal aortic aneurysm, without rupture<br>I71.8 Aortic aneurysm of unspecified site, ruptured<br>I71.9 Aortic aneurysm of unspecified site, without rupture |

**WebTable 4.** ICD-10 codes for outcome definition in sensitivity analyses

| <b>Analysis</b>                                                                                                                                                            | <b>Data sources</b>                                   | <b>Outcome capture</b>                                                      | <b>ICD-10 code</b>                                                                                                                                                                                                     |
|----------------------------------------------------------------------------------------------------------------------------------------------------------------------------|-------------------------------------------------------|-----------------------------------------------------------------------------|------------------------------------------------------------------------------------------------------------------------------------------------------------------------------------------------------------------------|
| Cases of aortic aneurysm with dissection or rupture alone, either associated with admission to hospital or emergency department or that were the underlying cause of death | National Patient Register and Cause of Death Register | Admission to hospital or emergency department, or underlying cause of death | I71.0, I71.1, I71.3, I71.5, I71.8                                                                                                                                                                                      |
| Cases of aortic aneurysm associated with admission to hospital alone (not emergency department) or that were the underlying cause of death                                 | National Patient Register and Cause of Death Register | Admission to hospital or underlying cause of death                          | I71.0-I71.9                                                                                                                                                                                                            |
| Cases of aortic aneurysm that also had aortic surgery within 30 days of the date of diagnosis, or that were the underlying cause of death                                  | National Patient Register and Cause of Death Register | Admission to hospital or underlying cause of death                          | I71.0-I71.9 + procedure code: FCA (not FCA83, FCA84), FCB (not FCB80, FCB82), FCC (not FCC80, FCC82), FCD (not FCD80, FCD82), FCE00, FCW96, PCG10, PCQ10, PDG (not PDG30), PDH (not PDH30), PDN10, PDP10, PDQ10, PDQ21 |

**WebTable 5.** Baseline characteristics before propensity score matching

| <b>Characteristic</b>                                     | <b>Oral fluoroquinolones<br/>(N=560,768)</b> | <b>Amoxicillin<br/>(n=440,504)</b> | <b>Standardized<br/>difference (%)</b> |
|-----------------------------------------------------------|----------------------------------------------|------------------------------------|----------------------------------------|
| <i>No of persons</i>                                      | 404,545                                      | 320,021                            | <i>N.A.</i>                            |
| Male sex, no. (%)                                         | 311,549 (56)                                 | 180,208 (41)                       | 29.6                                   |
| Age, yr, mean (SD)                                        | 69.4 (11.1)                                  | 67.7 (10.4)                        | 15.2                                   |
| Region of residence, no. (%)                              |                                              |                                    |                                        |
| Stockholm metropolitan area                               | 114,494 (20)                                 | 123,372 (28)                       | 17.8                                   |
| Rest of Mid Sweden                                        | 116,456 (21)                                 | 77,247 (18)                        | 8.2                                    |
| Southern Sweden metropolitan areas                        | 94,595 (17)                                  | 70,772 (16)                        | 2.2                                    |
| Rest of Southern Sweden                                   | 182,431 (33)                                 | 135,236 (31)                       | 3.9                                    |
| Northern Sweden                                           | 52,103 (9)                                   | 33,394 (8)                         | 6.2                                    |
| Missing                                                   | 689 (0.1)                                    | 483 (0.1)                          | 0.4                                    |
| Medical history, no. (%)                                  |                                              |                                    |                                        |
| Acute coronary syndrome                                   | 21,631 (4)                                   | 17,210 (4)                         | 0.3                                    |
| Other ischemic heart disease                              | 57,942 (10)                                  | 50,142 (11)                        | 3.4                                    |
| Heart failure/cardiomyopathy                              | 27,899 (5)                                   | 28,646 (7)                         | 6.6                                    |
| Valve disorders                                           | 10,089 (2)                                   | 30,428 (7)                         | 25.2                                   |
| Cerebrovascular disease                                   | 37,609 (7)                                   | 24,690 (6)                         | 4.6                                    |
| Arterial disease                                          | 15,025 (3)                                   | 11,396 (3)                         | 0.6                                    |
| Arrhythmia                                                | 56,305 (10)                                  | 52,657 (12)                        | 6.1                                    |
| Cardiac surgery/invasive cardiac procedure in previous yr | 23,864 (4)                                   | 30,752 (7)                         | 11.9                                   |
| Lung disease                                              | 39,656 (7)                                   | 59,669 (14)                        | 21.4                                   |
| Cancer                                                    | 72,326 (13)                                  | 44,044 (10)                        | 9.1                                    |
| Cancer in previous yr                                     | 48,395 (9)                                   | 26,847 (6)                         | 9.7                                    |
| Liver disease                                             | 5221 (1)                                     | 4867 (1)                           | 1.7                                    |
| Renal disease                                             | 14,811 (3)                                   | 12,339 (3)                         | 1.0                                    |
| Rheumatic disease                                         | 21,271 (4)                                   | 23,434 (5)                         | 7.3                                    |
| Psychiatric disorder                                      | 33,633 (6)                                   | 27,711 (6)                         | 1.2                                    |
| Prescription-drug use in previous yr, no. (%)             |                                              |                                    |                                        |
| ACE-inhibitor or ARB                                      | 182,479 (33)                                 | 148,426 (34)                       | 2.5                                    |
| Calcium channel blocker                                   | 99,737 (18)                                  | 80,260 (18)                        | 1.1                                    |
| Loop diuretic                                             | 78,508 (14)                                  | 67,566 (15)                        | 3.8                                    |
| Other diuretic                                            | 79,142 (14)                                  | 66,897 (15)                        | 3.0                                    |
| Beta-blocker                                              | 177,092 (32)                                 | 147,105 (33)                       | 3.9                                    |
| Digoxin                                                   | 13,555 (2)                                   | 12,497 (3)                         | 2.6                                    |
| Nitrates                                                  | 51,974 (9)                                   | 40,423 (9)                         | 0.3                                    |
| Platelet inhibitor                                        | 158,160 (28)                                 | 114,984 (26)                       | 4.7                                    |
| Anticoagulant                                             | 33,918 (6)                                   | 43,539 (10)                        | 14.2                                   |
| Lipid lowering drug                                       | 150,160 (27)                                 | 128,689 (29)                       | 5.4                                    |
| Oral antidiabetic drug                                    | 52,582 (9)                                   | 36,130 (8)                         | 4.2                                    |
| Insulin                                                   | 32,443 (6)                                   | 22,997 (5)                         | 2.5                                    |
| Antidepressant                                            | 92,578 (17)                                  | 75,391 (17)                        | 1.6                                    |
| Antipsychotic                                             | 15,082 (3)                                   | 9311 (2)                           | 3.8                                    |
| Anxiolytic, hypnotic or sedative                          | 173,213 (31)                                 | 135,935 (31)                       | 0.1                                    |
| Beta-2 agonist inhalant                                   | 48,649 (9)                                   | 70,154 (16)                        | 22.2                                   |
| Anticholinergic inhalant                                  | 21,310 (4)                                   | 38,760 (9)                         | 20.7                                   |
| Glucocorticoid inhalant                                   | 64,393 (12)                                  | 90,660 (21)                        | 25.0                                   |
| Oral glucocorticoid                                       | 71,900 (13)                                  | 79,409 (18)                        | 14.4                                   |
| NSAID                                                     | 163,654 (29)                                 | 124,384 (28)                       | 2.1                                    |
| Opiate                                                    | 118,780 (21)                                 | 96,053 (22)                        | 1.5                                    |
| Systemic hormone replacement therapy                      | 91,772 (16)                                  | 75,893 (17)                        | 2.3                                    |
| No. of drugs used                                         |                                              |                                    |                                        |

|                                                                    |              |              |      |
|--------------------------------------------------------------------|--------------|--------------|------|
| 1-2                                                                | 124,062 (22) | 88,054 (20)  | 2.1  |
| 3-5                                                                | 177,064 (32) | 137,075 (31) | 1.5  |
| 6-9                                                                | 159,914 (29) | 132,612 (30) | 2.3  |
| ≥10                                                                | 99,728 (18)  | 82,763 (19)  | 2.1  |
| Non-study antibiotic in previous 120 d, no. (%)                    | 186,866 (33) | 111,748 (25) | 17.5 |
| Health care utilization, no. (%)                                   |              |              |      |
| Hospitalization due to cardiovascular causes in previous yr        | 25,576 (5)   | 22,926 (5)   | 3.0  |
| Hospitalization due to non-cardiovascular causes in previous yr    | 176,447 (32) | 127,760 (29) | 5.4  |
| Outpatient contact due to cardiovascular causes in previous yr     | 39,143 (7)   | 42,753 (10)  | 9.9  |
| Outpatient contact due to non-cardiovascular causes in previous yr | 305,580 (55) | 236,452 (54) | 1.6  |
| Emergency department visit in previous 30 d                        | 40,357 (7)   | 19,218 (4)   | 12.2 |



**WebTable 6.** Cases of aortic aneurysm or dissection occurring in 60-day risk period from start of treatment with oral fluoroquinolones, as compared with amoxicillin, according to type of aneurysm

| <b>Type of Aneurysm (ICD-10 code)</b>                                 | <b>Fluoroquinolones</b> | <b>Amoxicillin</b>  | <b>Hazard Ratio (95% CI)</b> |
|-----------------------------------------------------------------------|-------------------------|---------------------|------------------------------|
|                                                                       | <i>No. of Cases</i>     | <i>No. of Cases</i> |                              |
| Dissection of aorta (I710)                                            | 9                       | 10                  | 0.93 (0.38-2.29)             |
| Thoracic or thoracoabdominal aortic aneurysm (I711, I712, I715, I716) | 15                      | 11                  | 1.90 (1.22-2.96)             |
| Abdominal aortic aneurysm (I713, I714)                                | 36                      | 14                  |                              |
| Aortic aneurysm of unspecified site (I718, I719)                      | 4                       | 5                   |                              |
